# Supplementary material
Source: Research Square preprint supplement (doi:10.21203/rs.3.rs-9552669/v1)
Supplement: Supplementary file 1 [file c71778519e36cfc8919fb114.docx]

# Appendix

## Students’ Questionnaire

### Demographics

- Gender: ☐ Male ☐ Female
- Year of study: ☐ First year ☐ Second year
- Self-rated English-speaking level: ☐ Weak ☐ Average ☐ Good

**5-point Likert Scale**

1 = Strongly Disagree
2 = Disagree
3 = Neutral
4 = Agree
5 = Strongly Agree

| S No. | Questions | Strongly disagree | Disagree | Neutral | Agree | Strongly agree |
| --- | --- | --- | --- | --- | --- | --- |
| **IV: USE OF VISUAL AIDS IN SPEAKING LESSONS** | | | | | | |
| 1 | My teacher frequently uses pictures, videos, or slides in speaking lessons. |  |  |  |  |  |
| 2 | Visual aids help me understand speaking topics more clearly. |  |  |  |  |  |
| 3 | Visual materials help me remember vocabulary related to the speaking topic. |  |  |  |  |  |
| 4 | Visual aids make speaking activities more interesting. |  |  |  |  |  |
| **DV: SPEAKING PARTICIPATION** | | | | | | |
| 5 | I speak more frequently in class when visual aids are used. |  |  |  |  |  |
| 6 | Visual aids encourage me to participate in pair and group discussions. |  |  |  |  |  |
| 7 | I am more willing to communicate in English during visual-based activities. |  |  |  |  |  |
| 8 | Visual aids help create a relaxed speaking environment. |  |  |  |  |  |
| **MODERATING VARIABLE: MOTIVATION AND CONFIDENCE** | | | | | | |
| 9 | Visual aids increase my motivation to participate in speaking activities. |  |  |  |  |  |
| 10 | I feel more confident speaking English when visual aids are used. |  |  |  |  |  |
| 11 | Visuals reduce my fear of making mistakes while speaking. |  |  |  |  |  |
| 12 | Visual aids help me express my ideas more easily. |  |  |  |  |  |

## Teacher Questionnaire

## Demographics

Teaching experience: ☐ 1–3 years ☐ 4–6 years ☐ Over 6 years

| S No. | Questions | Strongly disagree | Disagree | Neutral | Agree | Strongly agree |
| --- | --- | --- | --- | --- | --- | --- |
| **TEACHING PRACTICES** | | | | | | |
| 1 | I regularly use visual aids in speaking lessons. |  |  |  |  |  |
| 2 | I use a variety of visual materials (pictures, videos, charts, slides). |  |  |  |  |  |
| 3 | Visual aids help contextualize speaking topics. |  |  |  |  |  |
| **PERCEIVED BENEFITS** | | | | | | |
| 5 | Visual aids increase students’ motivation to speak. |  |  |  |  |  |
| 6 | Visual aids help reduce students’ speaking anxiety. |  |  |  |  |  |
| 7 | Students participate more actively when visual aids are used. |  |  |  |  |  |
| 8 | Visuals help students generate ideas for speaking tasks. |  |  |  |  |  |
| **CHALLENGES** | | | | | | |
| 9 | Preparing visual aids requires extra time. |  |  |  |  |  |
| 10 | Technical problems limit the use of visual aids. |  |  |  |  |  |
| 11 | Some students rely too much on visuals instead of language use. |  |  |  |  |  |
